# Supplementary material for: A family of germanates constructed from Ge7 clusters co-templated by metal complexes and organic/inorganic species
Source: Royal Society of Chemistry journal article supplement (doi:10.1039/c4ce00671b), 2014-01-01
Supplement: c4ce00671b1.pdf [file c4ce00671b1.pdf]

## Supporting Information

# A Family of Germanates Constructed from Ge<sub>7</sub> Clusters Co-templated by Metal Complexes and Organic/Inorganic Species

Xiaoyan Ren,<sup>b</sup> Qinhe Pan,<sup>a,\*</sup> Jiancong Liu,<sup>b</sup> Yi Li,<sup>b</sup> Fuxiang Wang,<sup>a</sup>

Jiyang Li,<sup>b,\*</sup> Yan Xu,<sup>b</sup> Li Li<sup>b</sup>

<sup>a</sup> Ministry of Education Key Laboratory of Advanced Materials of Tropical Island Resources, Department of Materials and Chemical Engineering, Hainan University, Haikou 570228, PR China

<sup>b</sup> State Key of laboratory of Inorganic Synthesis and Preparative Chemistry, College of Chemistry, Jilin University, Changchun 130012, PR China

## Table of contents

**Fig. S1** The experimental and simulated X-ray power diffraction patterns for **JLG-3**.

**Fig. S2** The experimental and simulated X-ray power diffraction patterns for **JLG-6**.

**Fig. S3** The experimental and simulated X-ray power diffraction patterns for **JLG-8**.

**Fig. S4** TG curves of **JLG-3**, **JLG-6** and **JLG-8**.

**Fig. S5** The X defined Ge<sub>7</sub> cluster of **JLG-3**, **JLG-6** and **JLG-8**.

**Fig. S6** The structure of (a) **JU-85** and (b) **JLG-3** viewed along the Ge<sub>7</sub> chains.

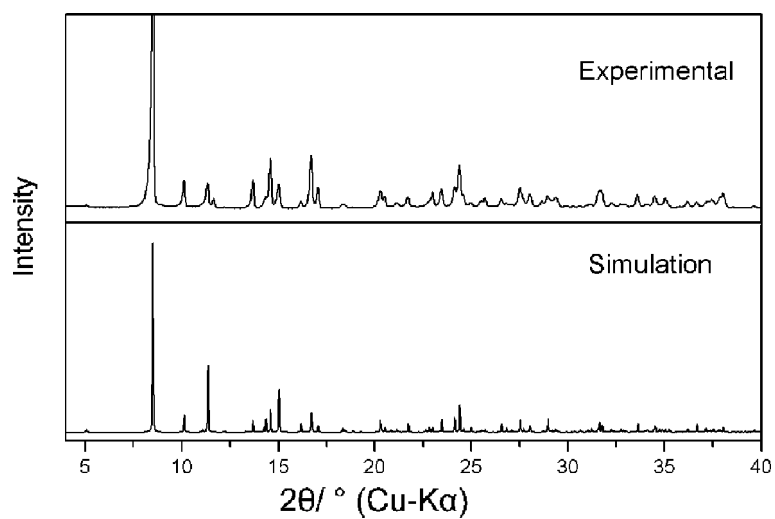

**Fig. S1** The experimental and simulated X-ray power diffraction patterns for **JLG-3**.

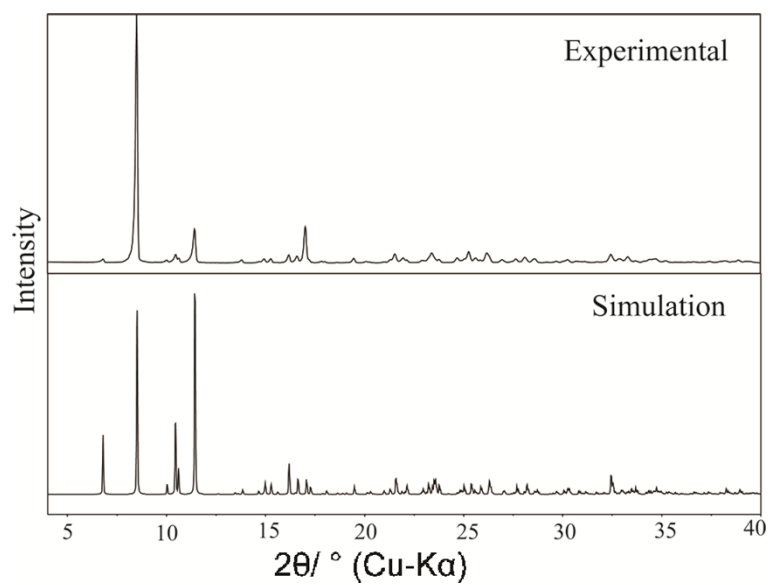

**Fig. S2** The experimental and simulated X-ray power diffraction patterns for **JLG-6**.

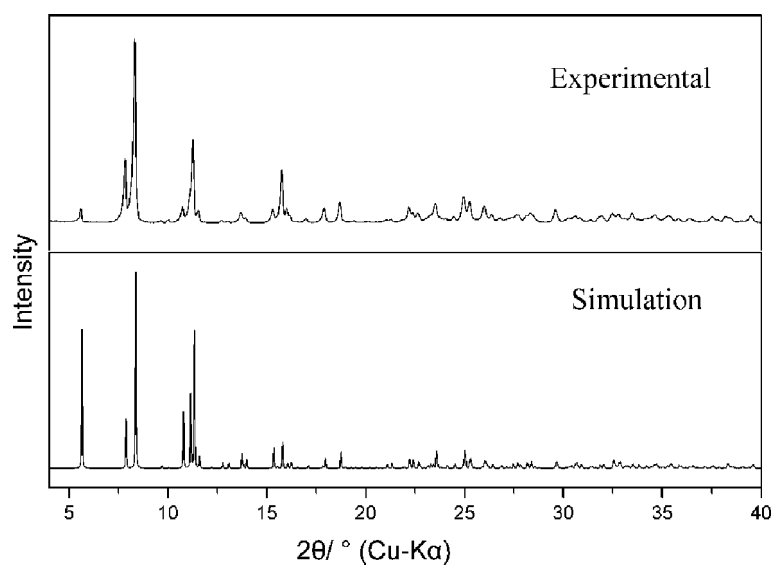

**Fig. S3** The experimental and simulated X-ray power diffraction patterns for **JLG-8**.

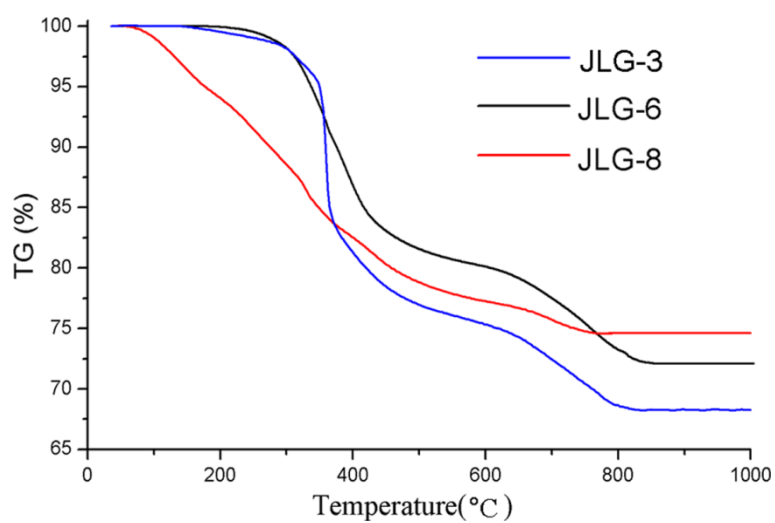

**Fig. S4** TG curves of **JLG-3**, **JLG-6** and **JLG-8**.

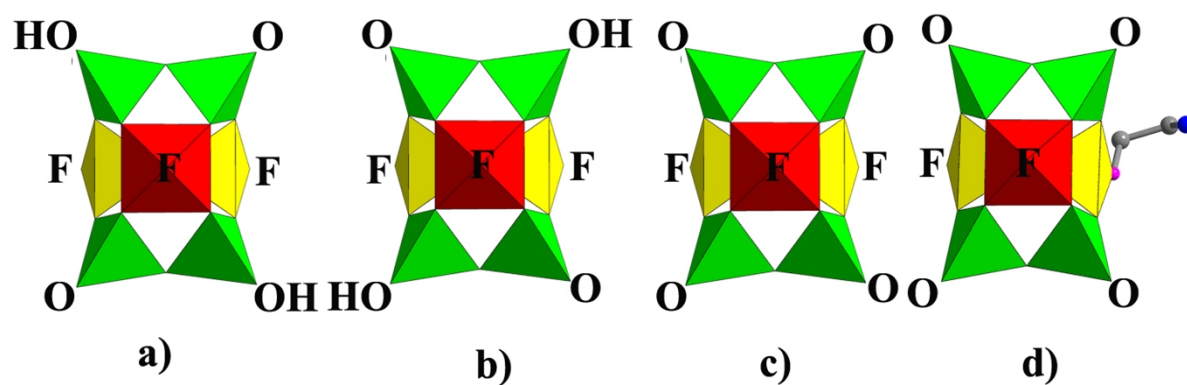

**Fig. S5** The X defined Ge<sub>7</sub> cluster of **JLG-3**, **JLG-6** and **JLG-8**. a) and b) are two different X defined Ge<sub>7</sub> clusters from R- and L- chains of **JLG-3**, respectively. c) is the X defined Ge<sub>7</sub> cluster of **JLG-8**, d) is the X defined Ge<sub>7</sub> cluster of **JLG-6**.

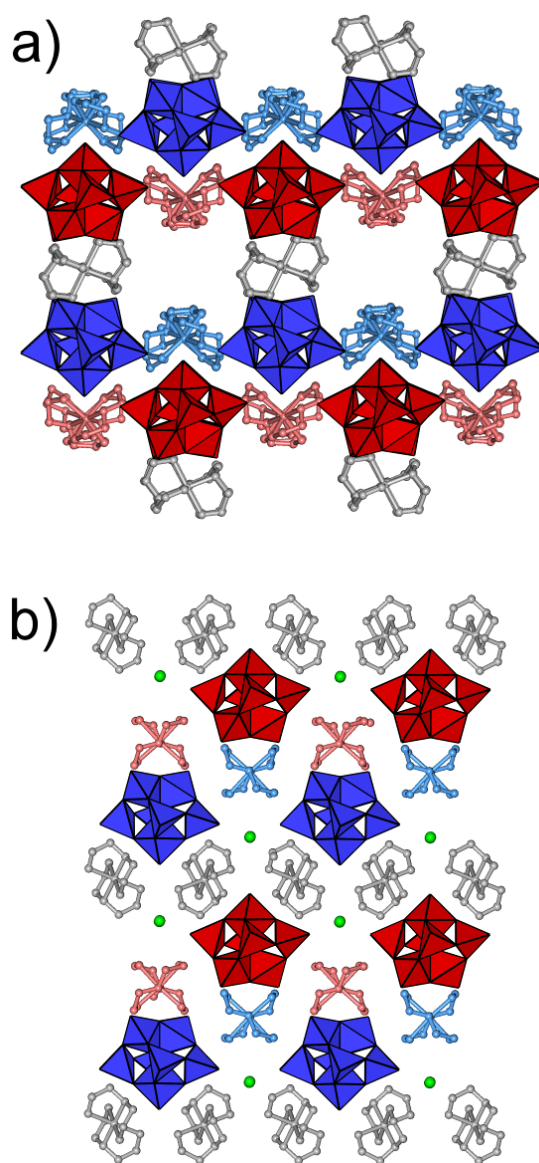

**FigureS6.** The structure of a) **JU-85** and b) **JLG-3** viewed along the Ge<sub>7</sub> chains. R- and L-Ge<sub>7</sub> clusters are shown as dark red and dark blue polyhedra;  $\Delta$ -*mer*-,  $\Lambda$ -*mer*-, and *s-fac*-Ni(dien)<sub>2</sub><sup>2+</sup> cations are shown as light red, light blue, and grey ball-and-sticks, respectively. Cl<sup>-</sup> anions in **JLG-3** are shown as green spheres. Water molecules are omitted for clarity.
